# Supplementary material
Source: MDPI journal article supplement (https://www.mdpi.com/2227-9040/10/2/64)
Supplement: s1 [file s1]

Supplementary Material

# Development of Fluorescent Carbon Nanoparticle-Based Probes for Intracellular pH and Hypochlorite Sensing

Yu-Syuan Lin <sup>1</sup>, Li-Wei Chuang <sup>1</sup>, Yu-Feng Lin <sup>1</sup>, Shun-Ruei Hu <sup>1</sup>, Chih-Ching Huang <sup>2,3,4</sup>, Yu-Fen Huang <sup>4,5,6,\*</sup> and Huan-Tsung Chang <sup>1,\*</sup>

<sup>1</sup> Department of Chemistry, National Taiwan University, Taipei 10617, Taiwan;

hero1245337@gmail.com (Y.-S.L.); abcdony@gmail.com (L.-W.C.); assassin52852@gmail.com (Y.-F.L.);

ick20140216@gmail.com (S.-R.H.)

<sup>2</sup> Department of Bioscience and Biotechnology, National Taiwan Ocean University, Keelung 20224, Taiwan;

huangjing@mail.ntou.edu.tw

<sup>3</sup> Center of Excellence for the Oceans, National Taiwan Ocean University, Keelung 20224, Taiwan

<sup>4</sup> School of Pharmacy, College of Pharmacy, Kaohsiung Medical University, Kaohsiung 80708, Taiwan

<sup>5</sup> Institute of Analytical and Environmental Sciences, National Tsing Hua University, Hsinchu 30013, Taiwan

<sup>6</sup> Department of Biomedical Engineering and Environmental Sciences, National Tsing Hua University, Hsinchu 30013, Taiwan

\* Correspondence: yufen@mx.nthu.edu.tw (Y.-F.H.); changht@ntu.edu.tw (H.-T.C.)

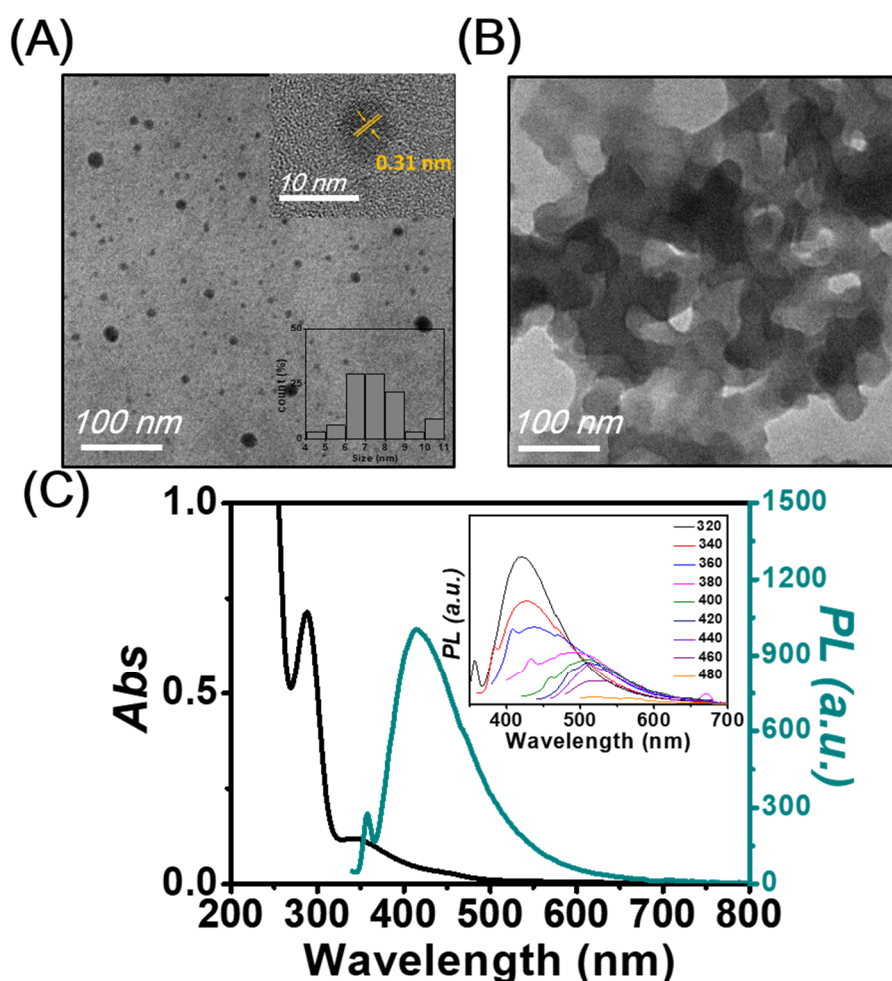

**Figure S1.** TEM images of (A) *m*-PD CDs (insets: high-resolution TEM image and size distribution analysis) and (B) AA nanoparticulates. (C) UV-Vis absorption and fluorescence spectra of *m*-PD CDs. Inset: fluorescence spectra of *m*-PD CDs in aqueous solution as a function of excitation wavelength.

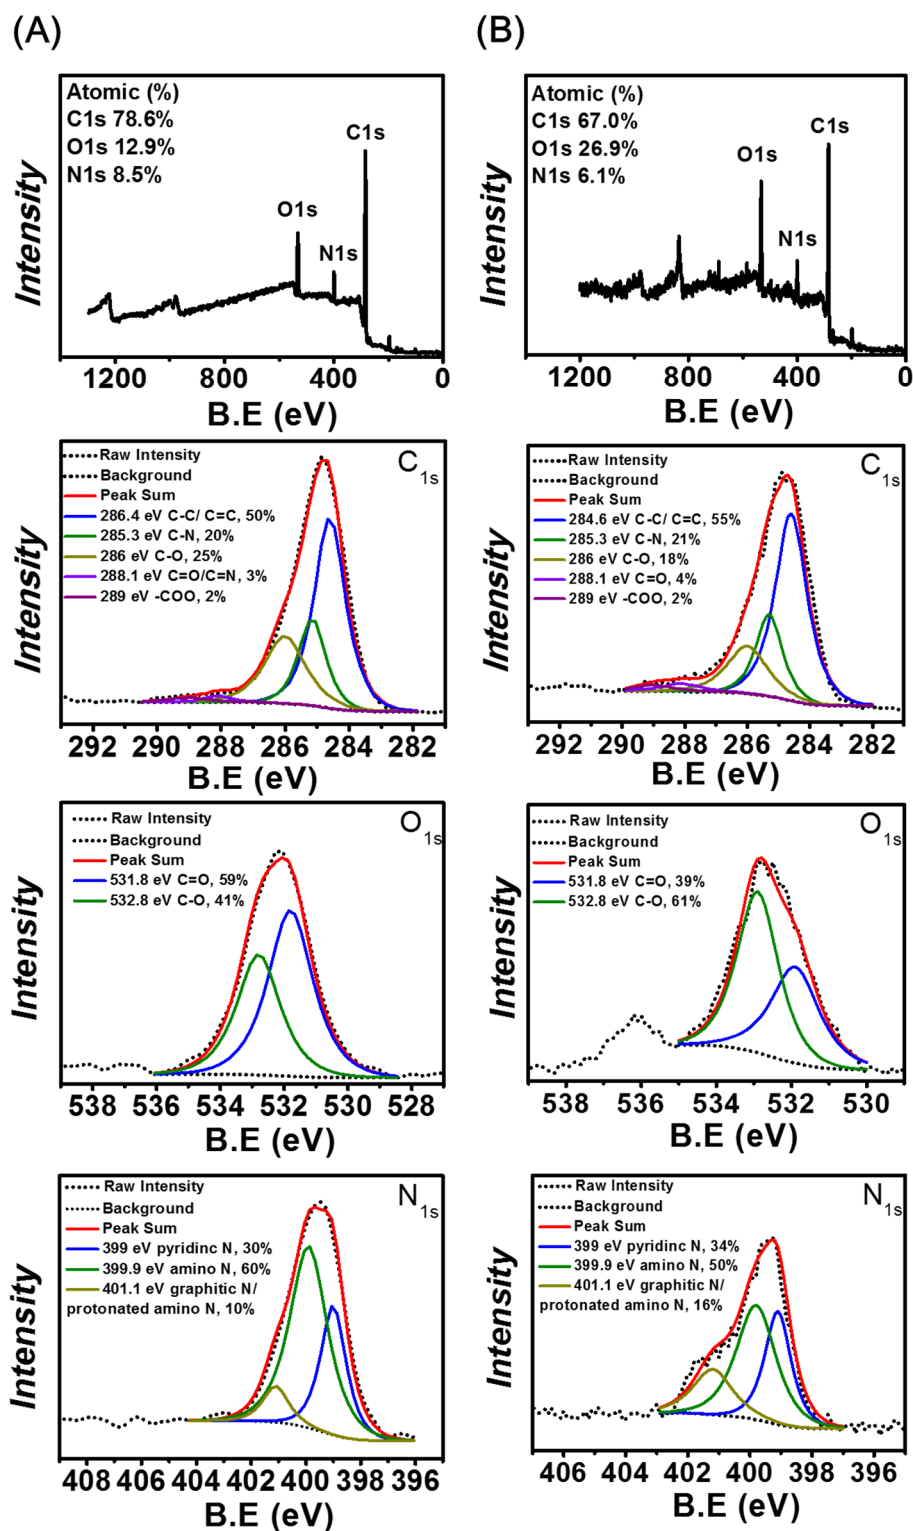

**Figure S2.** XPS survey spectra and high-resolution XPS scan spectra over C<sub>1s</sub>, O<sub>1s</sub> and N<sub>1s</sub> of (A) mPA CNPs and (B) *m*-PD CDs.

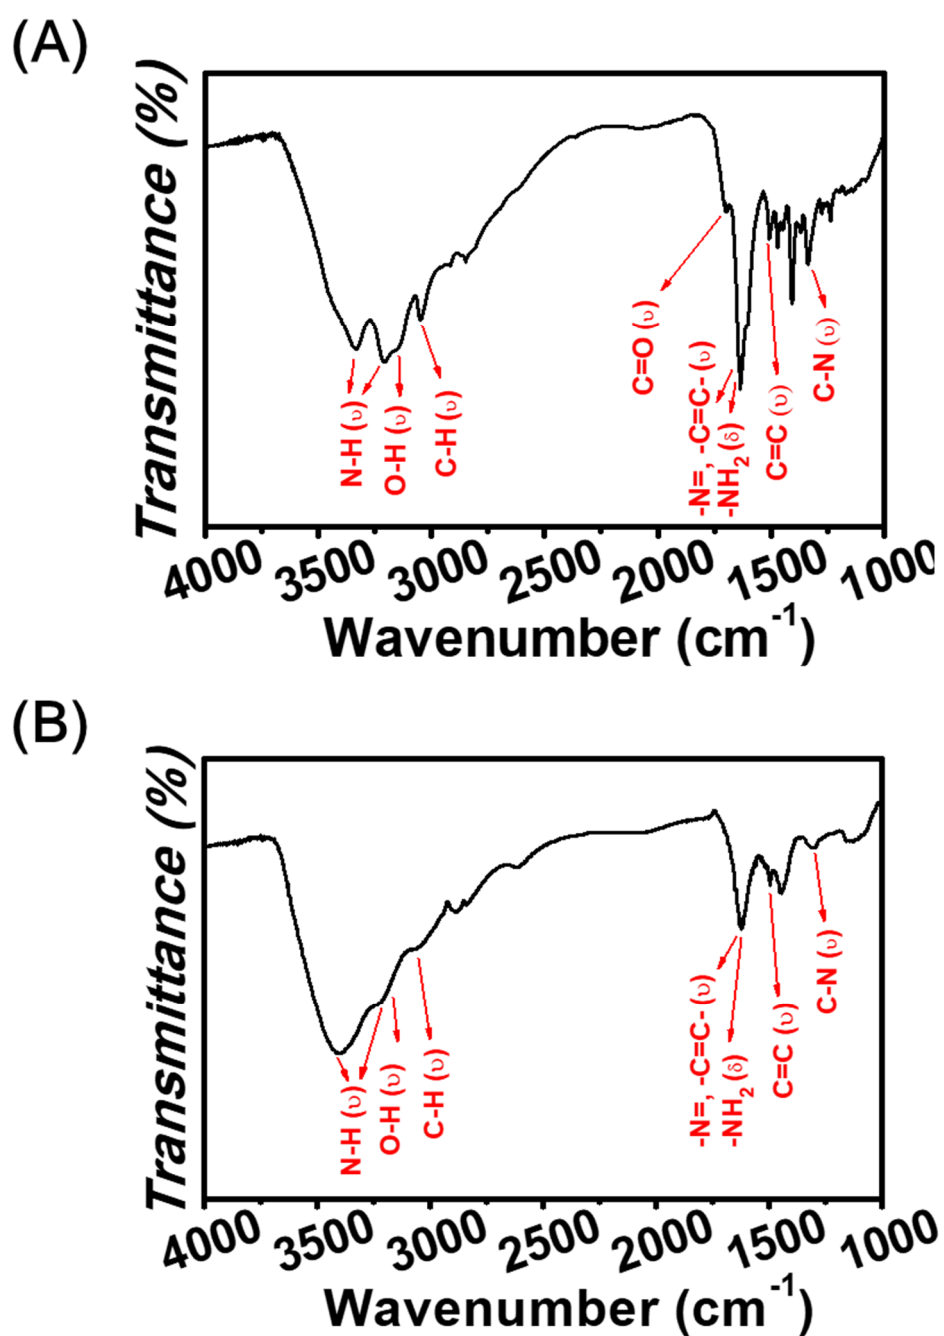

Figure S3. FT-IR spectra of (A) mPA CNPs and (B) *m*-PD CDs ( $\nu$ : stretching,  $\delta$ : bending).

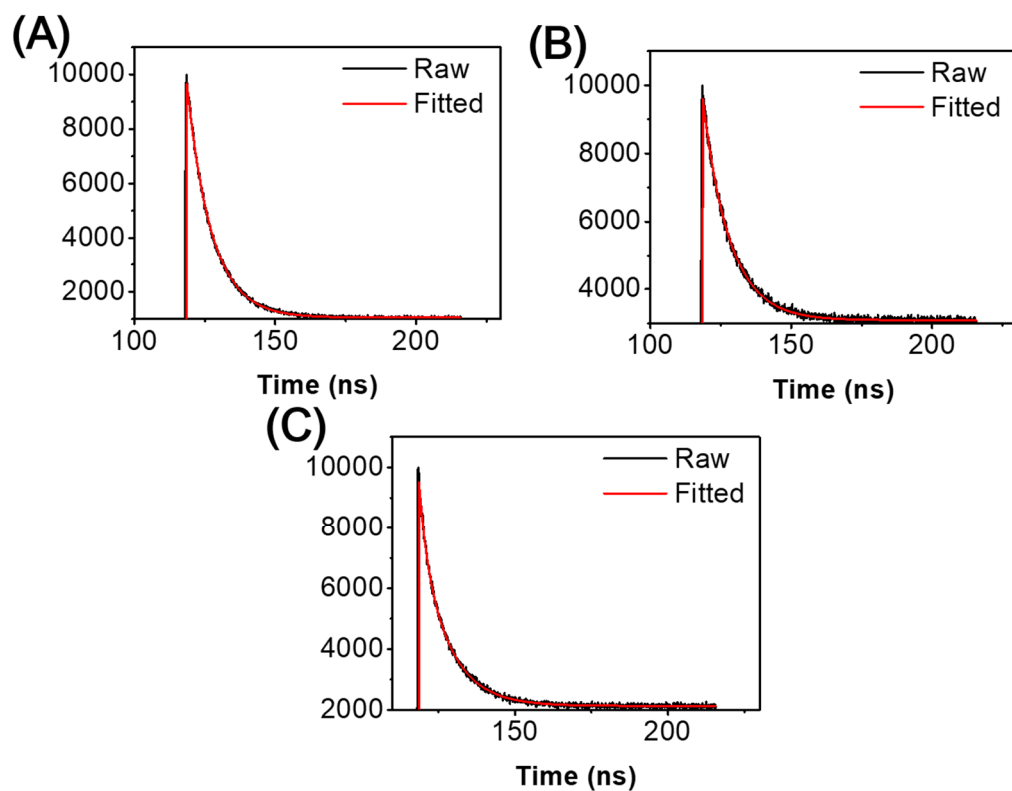

**Figure S4.** Fluorescence decay curves of mPA CNPs ( $1.0 \mu\text{g mL}^{-1}$ ) at pH (A) 3.0, (B) 7.0 and, (C) 11.0 upon excitation using a 375-nm pulsed laser.

(A)

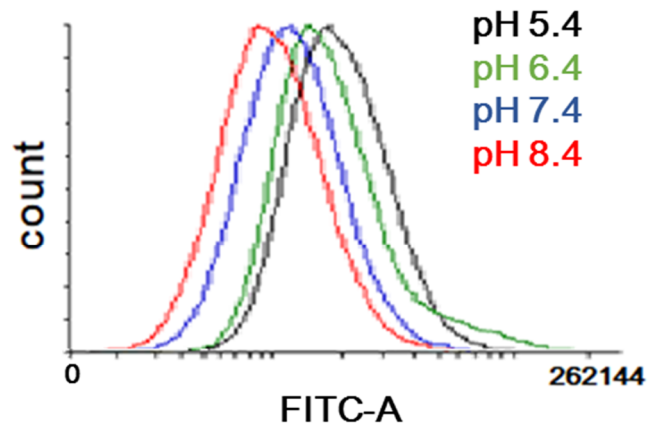

(B)

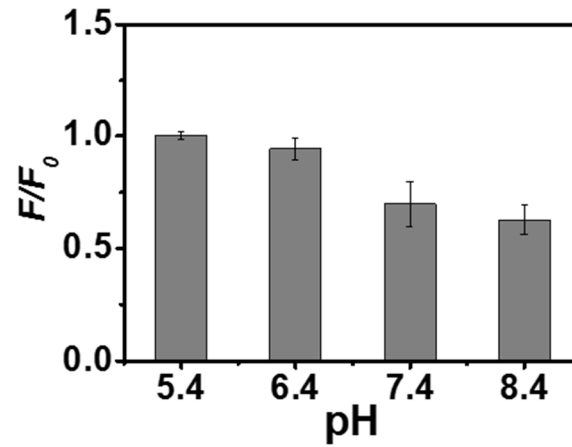

**Figure S5.** Flow cytometry analysis of Tramp C1 cells treated with mPA CNPs ( $5 \mu\text{g mL}^{-1}$ ) at various pH values for 2 h. (A) A histogram (number of events versus FITC channel signal) and (B) The bar graph representing the relative fluorescence intensity ( $F/F_0$ ) versus the pH value.  $F_0$  and  $F$  denote the mean fluorescence intensities of mPA CNPs in Tramp C1 cells at pH 5.4 and other specific pH values, respectively.

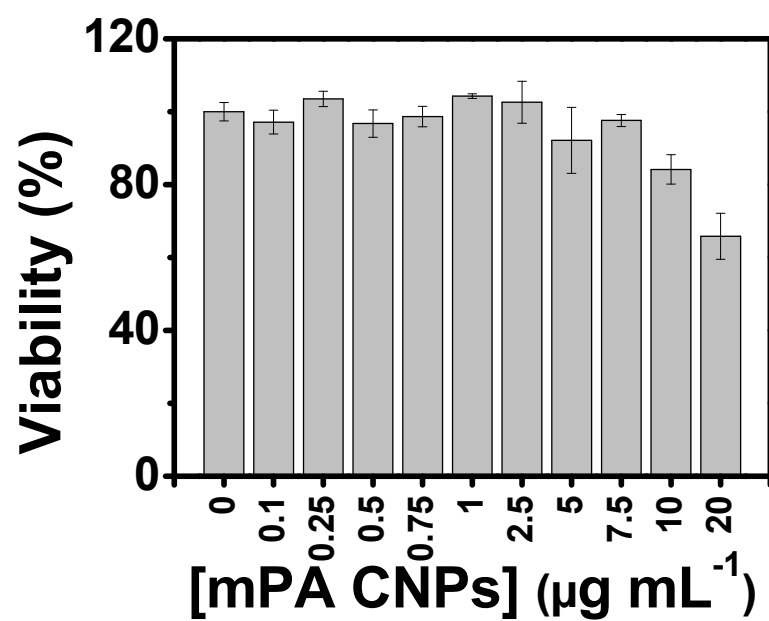

**Figure S6.** Cell viability for Tramp C1 cells in the presence of a series of concentrations of mPA CNPs.

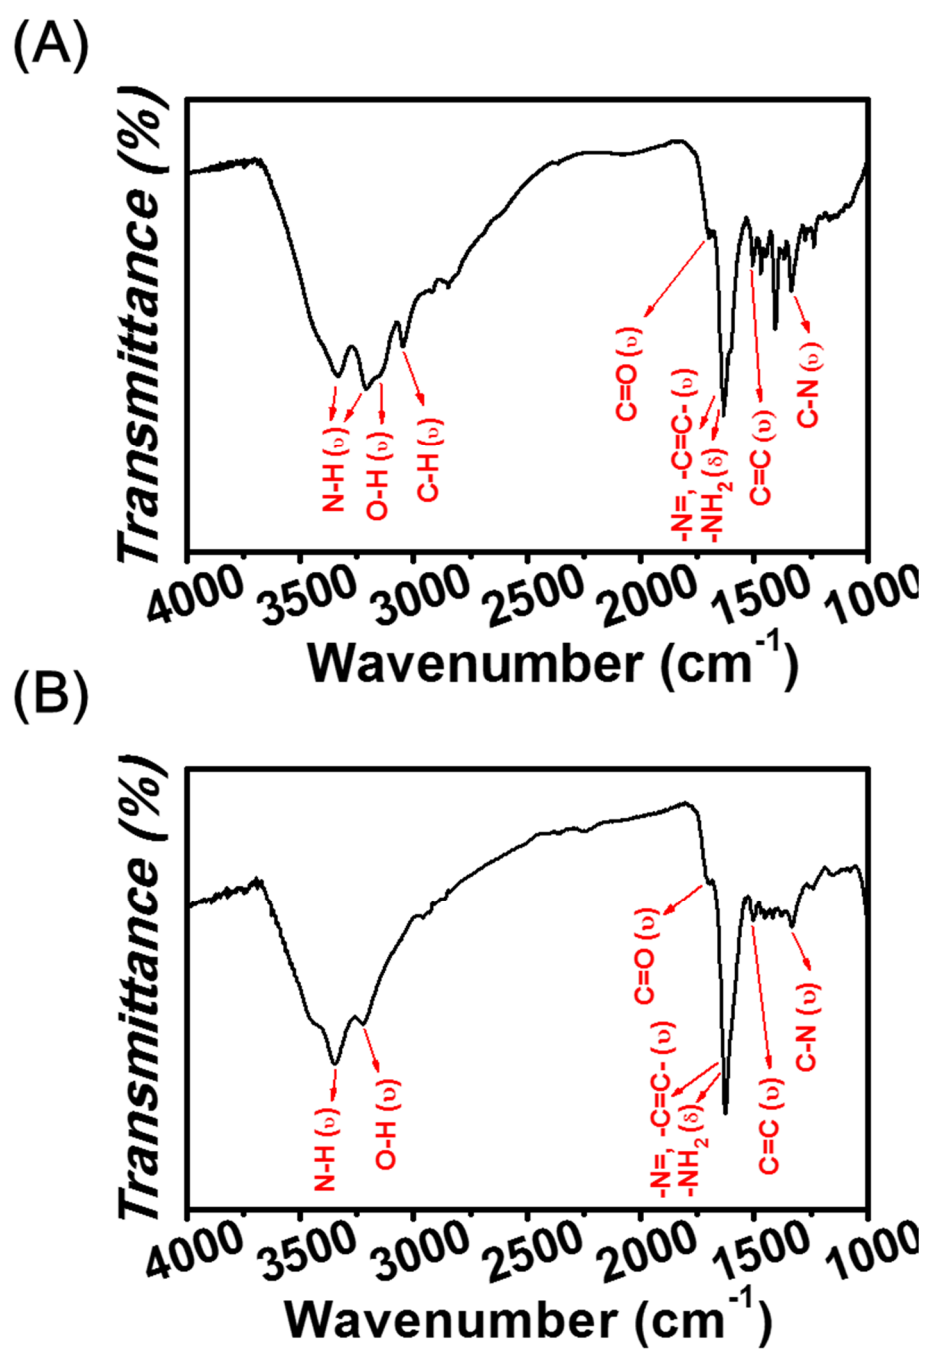

**Figure S7.** FT-IR spectra of mPA CNPs in the (A) absence and (B) presence of NaClO (100  $\mu\text{M}$ ).

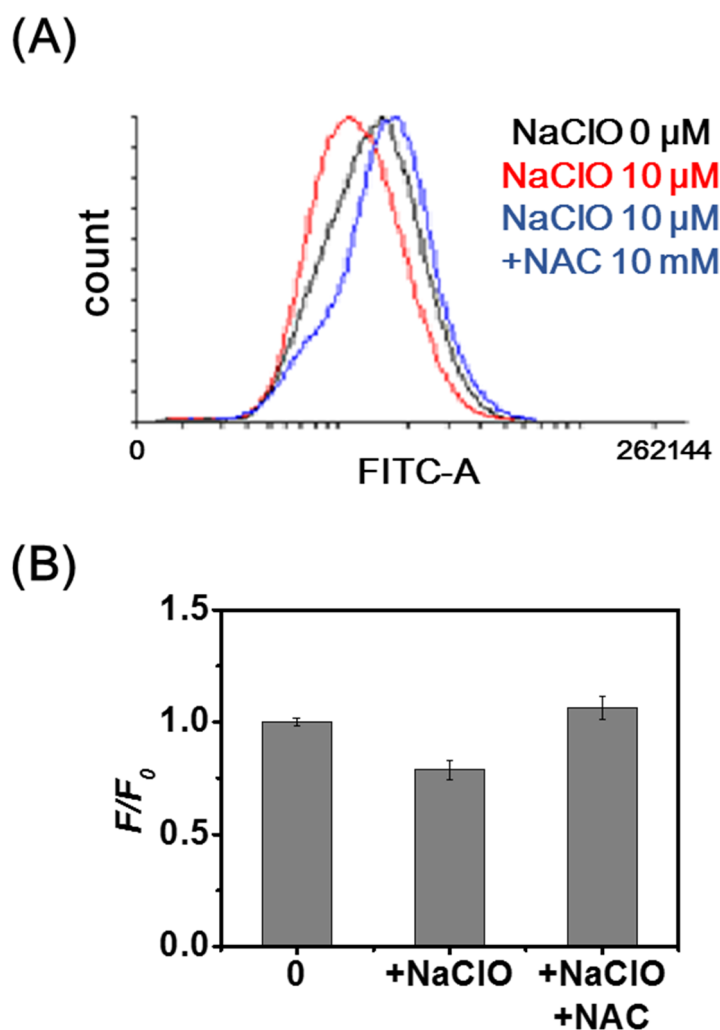

**Figure S8.** Flow cytometry analysis of Tramp C1 cells stained with mPA CNPs ( $5 \mu\text{g mL}^{-1}$ ) incubated with NaClO ( $10 \mu\text{M}$ ) or NaClO/NAC ( $10 \mu\text{M}$  and  $10 \text{ mM}$ , respectively) for 30 min. (A) A histogram (number of events versus FITC channel signal) and (B) The bar graph representing the relative fluorescence intensity ( $F/F_0$ ) versus different treatments.  $F_0$  and  $F$  denote the mean fluorescence intensities of mPA CNPs in Tramp C1 cells in the absence and presence of hypochlorite.

**Table S1.** Zeta potentials of mPA CNPs ( $1 \mu\text{g mL}^{-1}$ ) at various pH values.

| pH   | Zeta Potential (mV) |
|------|---------------------|
| 3.0  | $16.3 \pm 1.3$      |
| 5.0  | $11.7 \pm 1.8$      |
| 7.0  | $6.5 \pm 0.6$       |
| 9.0  | $-2.1 \pm 1.5$      |
| 11.0 | $-4.7 \pm 1.4$      |



**Table S2.** Comparison of the in vitro fluorescence behavior of mPA CNPs with other CD-based pH sensors.

| Materials | Precursors                                                          | Linear pH Range      | Dosage ( $\mu\text{g mL}^{-1}$ ) | Labeling Time (h) | Reference |
|-----------|---------------------------------------------------------------------|----------------------|----------------------------------|-------------------|-----------|
| pH-CDs    | <i>p</i> -phenylenediamine, <i>o</i> -phenylenediamine and dopamine | 3.5–6.5              | 20                               | 0.5               | 16        |
| N-CDs     | <i>p</i> -phenylenediamine                                          | 2.6–4.6;<br>5.0–6.8  | 600                              | 0.5               | 38        |
| CDs       | anthranilic acid and <i>o</i> -phenylenediamine                     | 3.0–8.0 (non-linear) | 400                              | 4                 | 48        |
| BNSCDs    | 4-carboxyphenyl-boronic acid and 2,5-diaminobenzenesul-fonic acid   | 1.6–7.0              | 500                              | 0.5               | 49        |
| Y-CDs     | <i>o</i> -phenylenediamine                                          | 4.0–8.2              | 40                               | 4                 | 52        |
| G-CDs     | <i>m</i> -phenylenediamine                                          | 6–10                 | 40                               | 5                 | 53        |
| CDs       | citric acid and basic fuchsin                                       | 5.2–8.8              | 500                              | 2                 | 54        |
| mPA CNPs  | <i>m</i> -phenylenediamine and ascorbic acid                        | 5.5–8.5              | 5                                | 2                 | This work |

**Table S3.** Comparison of the fluorescence behavior of mPA CNPs with other CD-based hypochlorite sensors.

| Materials             | Precursors                                   | Linear Range ( $\mu\text{M}$ ) | LOD (nM) | Reference |
|-----------------------|----------------------------------------------|--------------------------------|----------|-----------|
| CDs                   | ethanol and $\text{H}_2\text{O}_2$           | 0.1–10                         | 80       | 24        |
| CDs                   | 3-aminophenylboronic acid and alizarin red S | 0–200                          | 4470     | 25        |
| Cl <sub>2</sub> N-CDs | dried shaddock peel and concentrated HCl     | 3.24–216                       | 2880     | 26        |
| GAAP-CDs              | glutaric acid and 3-aminophenylboronic acid  | 0.1–100                        | 500      | 27        |
| N-CDs                 | neutral red and glutamine                    | 1.5–112.5; 112.5–187.5         | 270      | 29        |
| N, P-CDs              | safranin T and phosphoric acid               | 0.74–5.93; 5.93–25.93          | 46.1     | 31        |
| RD-CDs                | 2,5-diaminobenzenesulfonic acid              | 0.1–100                        | 83       | 55        |
| mPA CNPs              | <i>m</i> -phenylenediamine and ascorbic acid | 0.125–1.25                     | 29       | This work |

**Table S4.** One electron redox potential of ROS and antioxidants.

| Redox couple                                                                 | $E^0/\text{V}$ |
|------------------------------------------------------------------------------|----------------|
| $\text{OH}^\cdot, \text{H}^+ / \text{H}_2\text{O}$                           | 2.33           |
| $\text{OCl}^\cdot, 2\text{H}^+ / \text{Cl}^\cdot, \text{H}_2\text{O}$        | 1.49           |
| $\text{ONOO}^\cdot, 2\text{H}^+ / \text{NO}_2^\cdot, \text{H}_2\text{O}$     | 1.4            |
| $\text{O}_2^\cdot, 2\text{H}^+ / \text{H}_2\text{O}_2$                       | 0.94           |
| $\text{H}_2\text{O}_2, \text{H}^+ / ^\cdot\text{OH}, \text{H}_2\text{O}$     | 0.38           |
| $\text{NO}_2^\cdot, \text{H}_2\text{O} / \text{NO}, 2\text{OH}^\cdot$        | −0.46          |
| $\text{C}_2\text{O}_4^{2-} / 2\text{CO}_2$                                   | −0.59          |
| $\text{BH}_4^-, 8\text{OH}^- / \text{H}_2\text{BO}_3^-, 5\text{H}_2\text{O}$ | −1.24          |
